# Supplementary material for: Firing rate adaptation affords place cell theta sweeps, phase precession, and procession
Source: eLife journal article supplement (doi:10.7554/elife.87055), 2023-05-17
Supplement: code1 [file elife-87055-code1-v1.zip]

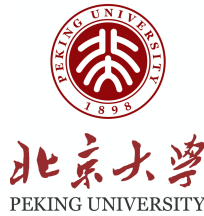

## Code instruction

The provided codes are written in Matlab and Python.

Here are some instructions for running the code:

- (1) The names of the code files are self-explained, as to produce the figures in the main text. All the figures generated by the provided codes are also included in the supplementary information.
- (2) To run Matlab code, users need to install the "signal processing toolbox" and ensure that the version of matlab is above Matlab2018.
- (3) To run Python code, users need to install numpy and matplotlib packages. The python3.9 environment is recommended.
